# Supplementary material for: Ubiquitin Ligase RNF146 Regulates Tankyrase and Axin to Promote Wnt Signaling
Source: PLoS One. 2011 Jul 25;6(7):e22595. doi: 10.1371/journal.pone.0022595 (PMC3143158; doi:10.1371/journal.pone.0022595)
Supplement: Table S2 — Sequences used for RNAi and qRT-PCR. (XLS) [file pone.0022595.s006.xls]

## Sheet: RNAI TARGET SEQUENCES
Accession	Gene-oligo	Sense strand sequence
NM_030963	RNF146-1	GGACGUCGCAGGAAGAUUA
NM_030963	RNF146-2	GGAUGUAUCUGCAGUUGUU
NM_030963	RNF146-3	GAUGGACAGUGCACAGUAA
NM_030963	RNF146-4	CCGUAAACCUAGCAAGAGA
NM_030963	RNF146 miRNA	TCTACTAGTGCGCTCATCGTAGTTTTGGCCACTGACTGACTACGATGAGCACTAGTAGA
NM_003747	TNKS1-A	CAUGAAGAGUUGAAAGAAAUU
NM_003747	TNKS1-B	ACACAGAGAUGGUGGUAAUUU
NM_025235	TNKS2-A	GGACAUAGGCACAAACUAAUU
NM_025235	TNKS2-B	GCACGUGGCAUCUGAGAAAUU
NM_181050	AXIN1-1	CGAGAGCCAUCUACCGAAA
NM_181050	AXIN1-2	GGAAAGGUGUUGGCAUUAA
NM_181050	AXIN1-3	GAGCAAGUUUCACCGAAGA
NM_181050	AXIN1-4	GCAUCGUUGUGGCGUACUA
NM_004655	AXIN2-1	AGACGGUGCUCCCGAUGUA
NM_004655	AXIN2-2	GCGCUAGUUGGUGACUUG
NM_004655	AXIN2-3	GAAAUGCGUGGAUACCUUA
NM_004655	AXIN2-4	GAUCCUGUUAAUCCUUAGC
NM_001904	CTNNB1-1	GAUCCUAGCUAUCGUUCUU
NM_001904	CTNNB1-2	UAAUGAGGACCUAUACUUA
NM_001904	CTNNB1-3	GCGUUUGGCUGAACCAUCA
NM_001904	CTNNB1-4	GGUACGAGCUGCUAUGUUC
NM_002336	LRP6-1	GCAGAUAUCAGACGAAUUU
NM_002336	LRP6-2	CAGAUGAACUGGAUUGUUA
NM_002336	LRP6-3	CCACAGAGCGAUCACAUUA
NM_002336	LRP6-4	GCUCAACCGUGAAGUUAUA

## Sheet: QRT-PCR PRIMERS PROBE SEQUENCES
Gene	Probe sequence
RNF146	CAGTATTAGAACAGGACTCGTTCGCTTTCC
AXIN1	AGCACTGCACCTGCCTCCAGC
AXIN2	TTGAGGGCTCAAGCTTTCCCTTGT
TNKS1	ATCTGGCAACAGCTGACGATATCAG
TNKS2	AACAGCATTGCATTGTGCTGCTGCA
LEFTY1	AACCTGAGGGCAGAAAGCCCAA
LEFTY2	AGCTGGAGCTGCACACCCTG A
GAD1	TCAGAAGGTCTTCGGAAATGTTGCCT
SAX1	AGCCTCACCGAGACGCAGGTC
SP5	CCGAGCACTGTT TCAAATCTCCCA
